# Supplementary material for: Coxiella Detection in Ticks from Wildlife and Livestock in Malaysia
Source: PubMed Central journal article supplement — Vector Borne Zoonotic Dis. 2016 Dec 1;16(12):744–51. doi: 10.1089/vbz.2016.1959 (PMC5144871; doi:10.1089/vbz.2016.1959), 2016-12-01
Supplement: Supp_Table1.pdf [file Supp_Table1.pdf]

## Supplementary Data

SUPPLEMENTARY TABLE S1. EUROPEAN NUCLEOTIDE  
ARCHIVE ACCESSION NUMBER FOR *HAEMAPHYSALIS*  
TICK *16S rRNA* SEQUENCES

---

This file provides the European Nucleotide Archive accession number for partial mitochondrial *16S rRNA* sequences amplified from *Haemaphysalis* tick hosts used in this study.
