# Supplementary material for: Coxiella Detection in Ticks from Wildlife and Livestock in Malaysia
Source: PubMed Central journal article supplement — Vector Borne Zoonotic Dis. 2016 Dec 1;16(12):744–51. doi: 10.1089/vbz.2016.1959 (PMC5144871; doi:10.1089/vbz.2016.1959), 2016-12-01
Supplement: Supp_Table2.pdf [file Supp_Table2.pdf]

SUPPLEMENTARY TABLE S2. SEQUENCES FROM NCBI GENBANK DATABASE USED IN PHYLOGENETIC ANALYSIS

| <i>Bacteria strain</i>                                                        | <i>Genes</i>   | <i>NCBI Accession</i> |
|-------------------------------------------------------------------------------|----------------|-----------------------|
| <i>Coxiella burnetii</i> CbuG Q212 strain                                     | 16s rRNA, rpoB | NC_011527             |
| <i>C. burnetii</i> Dugway 5J108-111                                           | 16s rRNA, rpoB | NC_009727             |
| <i>C. burnetii</i> RSA 331                                                    | 16s rRNA, rpoB | NC_010117             |
| <i>C. burnetii</i> RSA 493                                                    | 16s rRNA, rpoB | NC_002971             |
| <i>C. burnetii</i> str. Namibia                                               | 16s rRNA, rpoB | NZ_CP007555           |
| <i>Coxiella</i> endosymbiont of <i>Amblyomma americanum</i>                   | 16s rRNA       | AY939824              |
| <i>Coxiella</i> symbionts in the <i>Amblyomma cajennense</i>                  | 16s rRNA       | HM133590              |
| <i>Coxiella</i> endosymbiont of <i>Amblyomma variegatum</i> isolate Avar1     | 16s rRNA       | KP994809              |
| <i>Coxiella</i> endosymbiont of <i>Dermacentor marginatus</i> isolate Dmar1   | 16s rRNA       | KP994811              |
| <i>Coxiella</i> endosymbiont of <i>Dermacentor silvarum</i> isolate Dsilv1    | 16s rRNA       | KP994813              |
| Bacterium symbiont of <i>Haemaphysalis shimoga</i> clone HSKY-3               | 16s rRNA       | HQ287535              |
| <i>Haemaphysalis longicornis</i> symbiont 47                                  | 16s rRNA       | AY342035              |
| <i>H. longicornis</i> symbiont A gene                                         | 16s rRNA       | AB001519              |
| Uncultured <i>Coxiella</i> sp. clone T3118 of <i>Ixodes uriae</i>             | 16s rRNA       | KJ459076              |
| <i>Coxiella</i> endosymbiont of <i>Haemaphysalis punctata</i> isolate Haepun3 | 16s rRNA       | KP994815              |
| <i>Coxiella</i> symbiont of <i>Ornithodoros rostratus</i>                     | 16s rRNA       | JN887879              |
| <i>Coxiella</i> sp. of <i>Rhipicephalus sanguineus</i>                        | 16s rRNA       | D84559                |
| <i>Coxiella</i> endosymbiont of <i>Rhipicephalus turanicus</i>                | 16s rRNA       | JQ480822              |
| <i>Coxiella</i> endosymbiont of <i>Amblyomma americanum</i>                   | rpoB           | CP007541              |
| <i>Coxiella</i> endosymbiont of <i>A. cajennense</i> isolate Acajen1          | rpoB           | KP985300              |
| <i>Coxiella</i> endosymbiont of <i>A. variegatum</i> isolate Avar1            | rpoB           | KP985304              |
| <i>Coxiella</i> endosymbiont of <i>Dermacentor silvarum</i> isolate Dsilv1    | rpoB           | KP985308              |
| <i>Coxiella</i> endosymbiont of <i>Dermacentor marginatus</i> isolate Dmar1   | rpoB           | KP985306              |
| <i>Coxiella</i> endosymbiont of <i>Haemaphysalis punctata</i> isolate Haepun3 | rpoB           | KP985310              |
| <i>Coxiella</i> endosymbiont of <i>Ixodes uriae</i> isolate Iuriael           | rpoB           | KP985312              |
| <i>Coxiella</i> endosymbiont of <i>O. rostratus</i> isolate Ororst3           | rpoB           | KP985290              |
| <i>Coxiella</i> endosymbiont of <i>R. sanguineus</i> isolate Rhsa1            | rpoB           | KP985338              |
| <i>Coxiella</i> endosymbiont of <i>R. turanicus</i> isolate Rhtura1           | rpoB           | KP985340              |
| <i>Legionella longbeachae</i> NSW150                                          | 16s rRNA, rpoB | FN650140              |
| <i>Legionella pneumophila</i> str. Lens                                       | 16s rRNA, rpoB | CR628337              |
